# Supplementary material for: Coupling of Nd doping and oxygen-rich vacancy in CoMoO4@NiMoO4 nanoflowers toward advanced supercapacitors and photocatalytic degradation
Source: Royal Society of Chemistry journal article supplement (doi:10.1039/d3cp04070d), 2023-01-01
Supplement: d3cp04070d1.pdf [file d3cp04070d1.pdf]

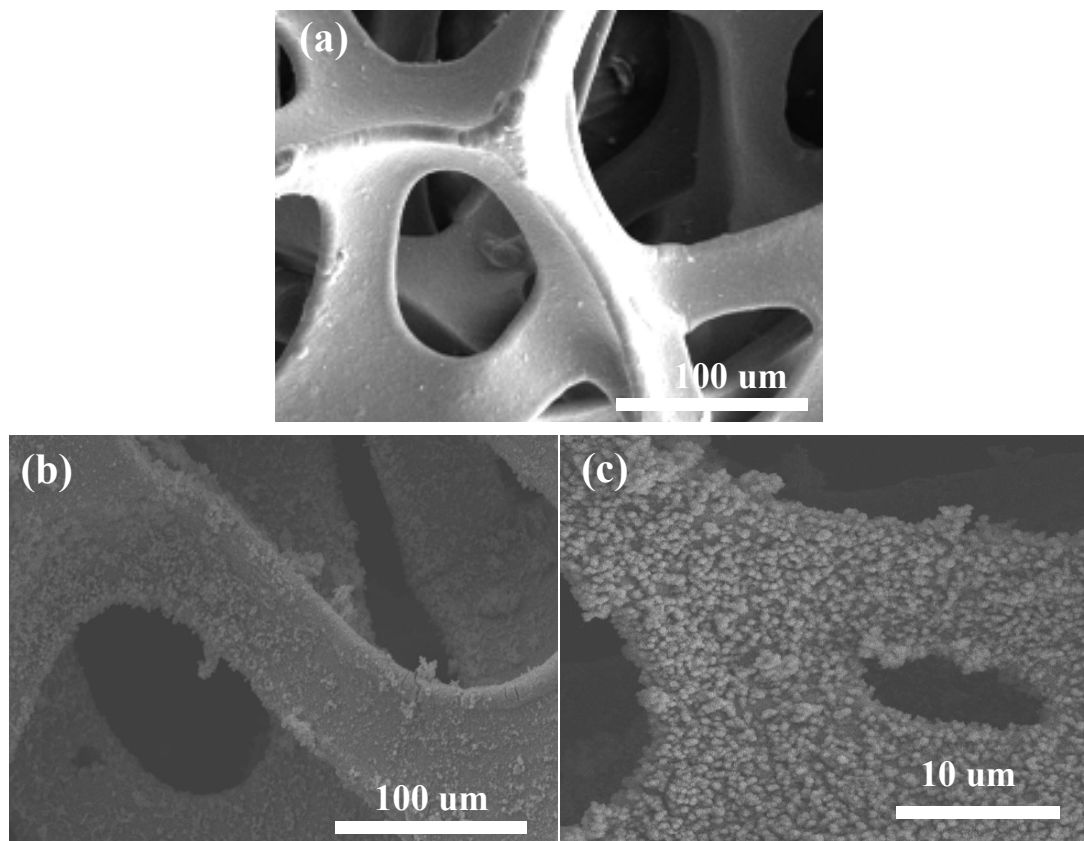

**Figure S1.** SEM images of (a) nickel foam; (b, c) SEM image of 0.8% Nd-CoMoO<sub>4</sub>@NiMoO<sub>4</sub> under different magnification on nickel foam.

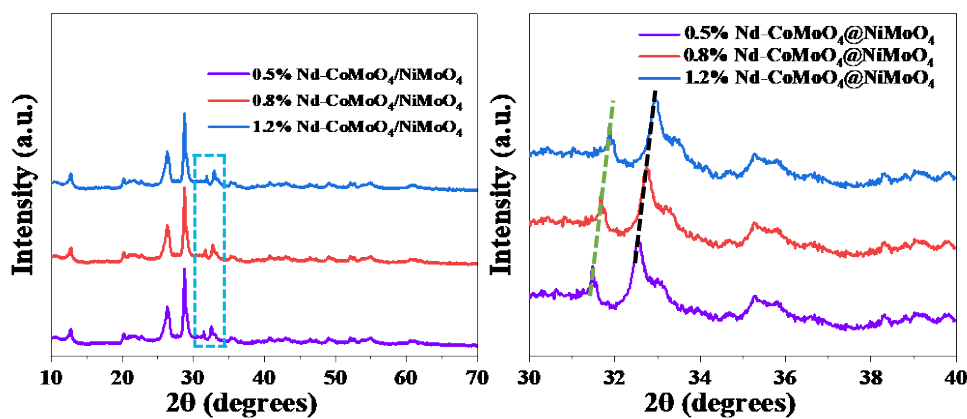

**Figure S2.** (a) XRD patterns of XRD of different Nd content in products; (b) corresponding amplified patterns of the diffraction peak around 32°.

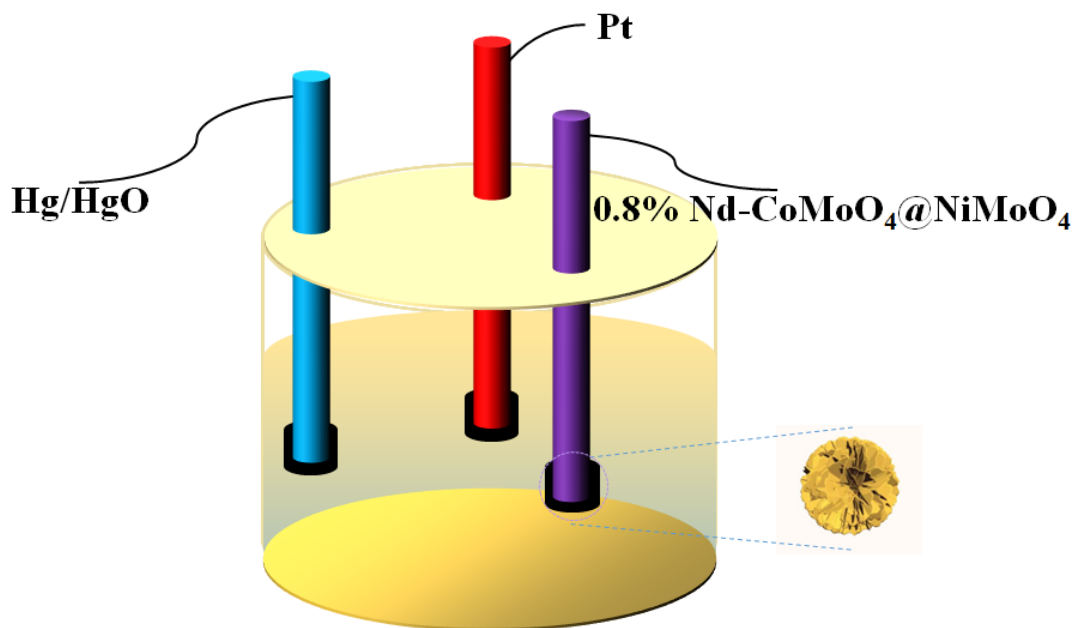

**Figure S3.** Schematic diagram of three-electrode test using 0.8% Nd-CoMoO<sub>4</sub>@NiMoO<sub>4</sub> as working electrode.

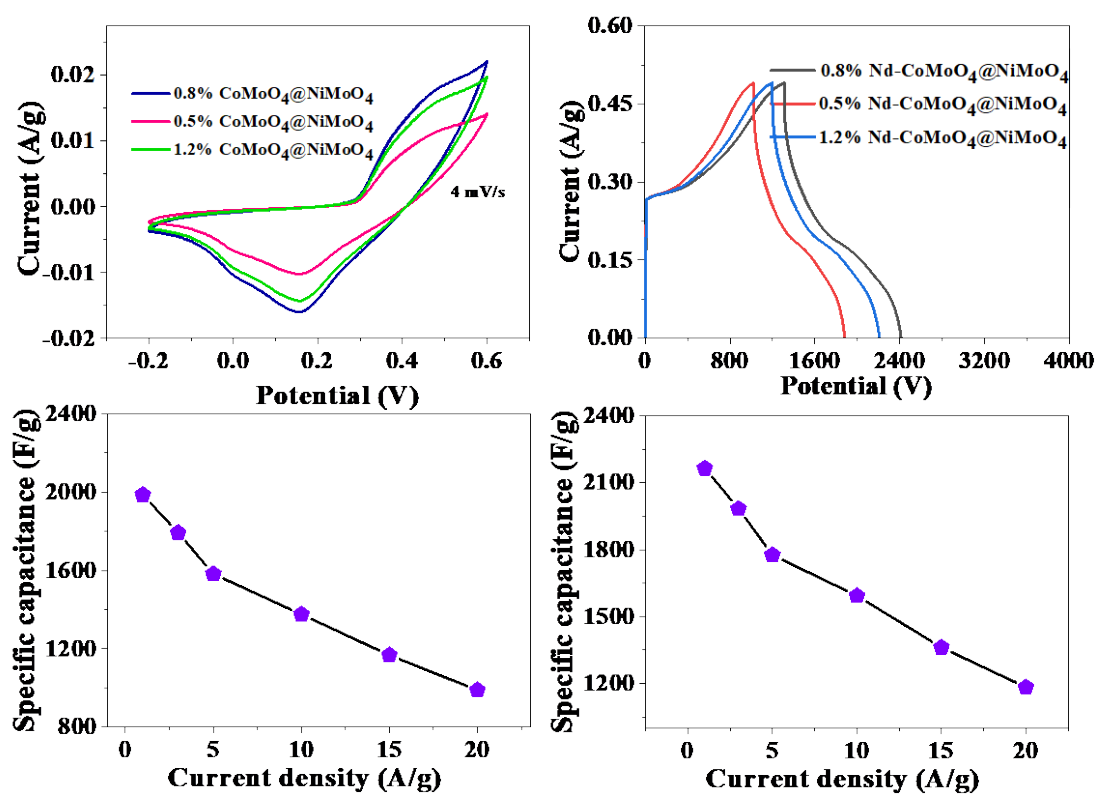

**Figure S4.** (a) CV curves of the 0.5% Nd-CoMoO<sub>4</sub>@NiMoO<sub>4</sub>, 0.8% Nd-CoMoO<sub>4</sub>@NiMoO<sub>4</sub> and 1.2% Nd-CoMoO<sub>4</sub>@NiMoO<sub>4</sub> at a scan rate of 4 mV/s; (b) Charge and discharge of the 0.5% Nd-CoMoO<sub>4</sub>@NiMoO<sub>4</sub>, 0.8% Nd-CoMoO<sub>4</sub>@NiMoO<sub>4</sub> and 1.2% Nd-CoMoO<sub>4</sub>@NiMoO<sub>4</sub>; (c) Plot of the current

density against the specific capacitance of 0.5% Nd-CoMoO<sub>4</sub>@NiMoO<sub>4</sub>; (d) Plot of the current density against the specific capacitance of 1.2% Nd-CoMoO<sub>4</sub>@NiMoO<sub>4</sub>.

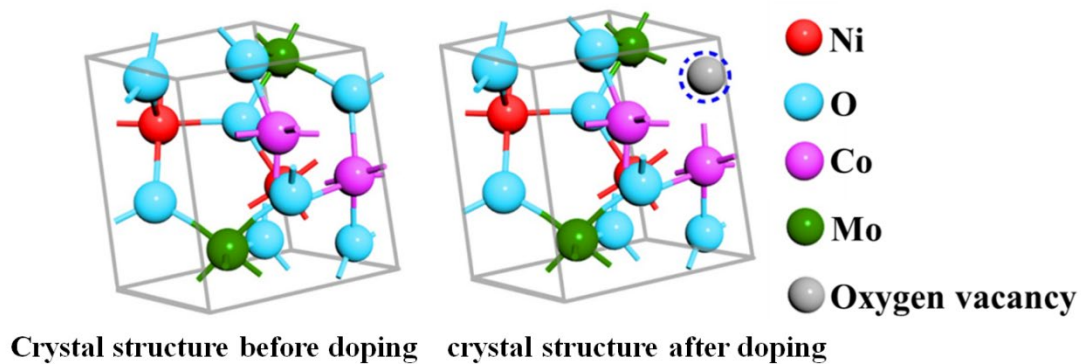

Figure S5. Crystal structure of rare earth element Nd before and after doping.

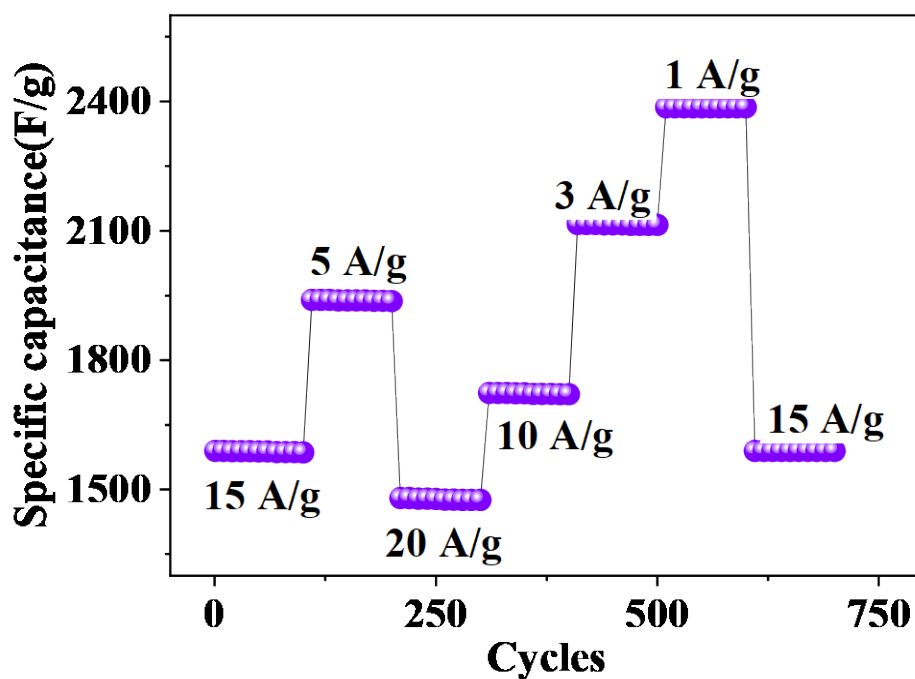

Figure S6. Rate and cycle performance of 0.8% Nd-CoMoO<sub>4</sub>@NiMoO<sub>4</sub> under different current densities.

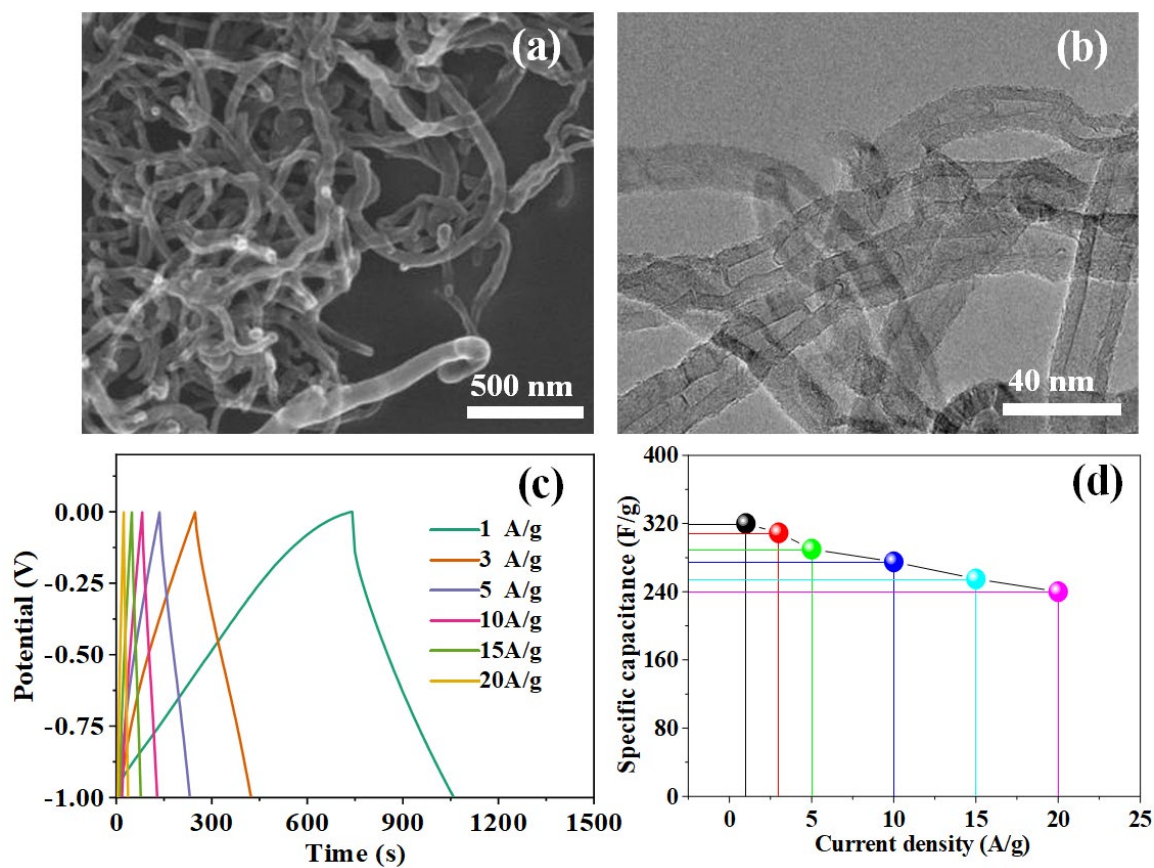

**Figure S7.** (a) SEM images of CNTs; (b) TEM image of CNTs; (c) charge and discharge of CNTs at different current densities; (d) Plot of the current density against the specific capacitance of CNTs.

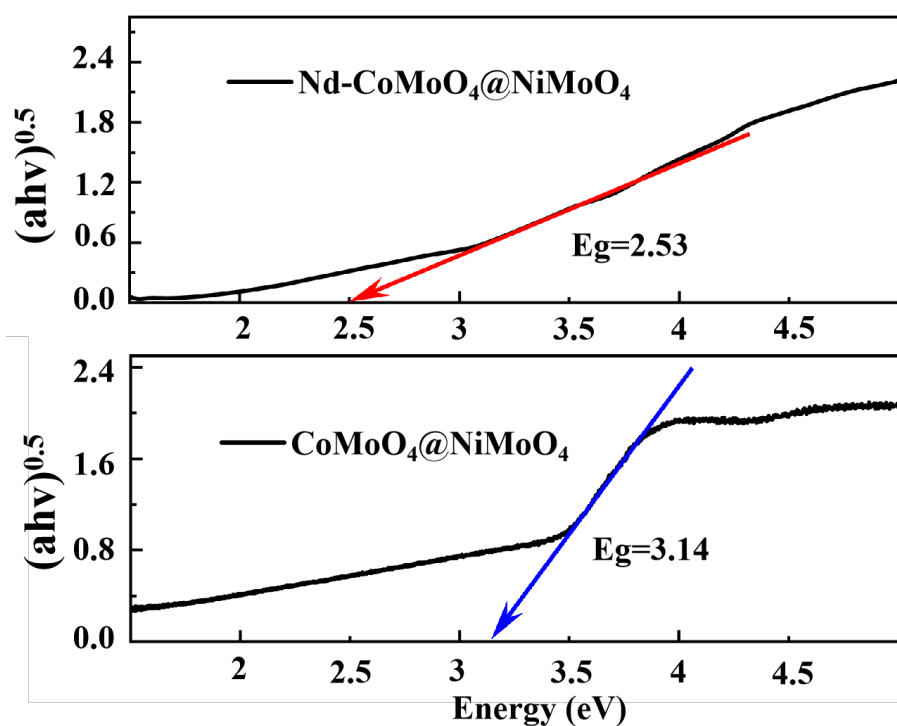

**Figure S8.** UV-Vis DRS images of 0.8% Nd-CoMoO<sub>4</sub>@NiMoO<sub>4</sub> and CoMoO<sub>4</sub>@NiMoO<sub>4</sub>.

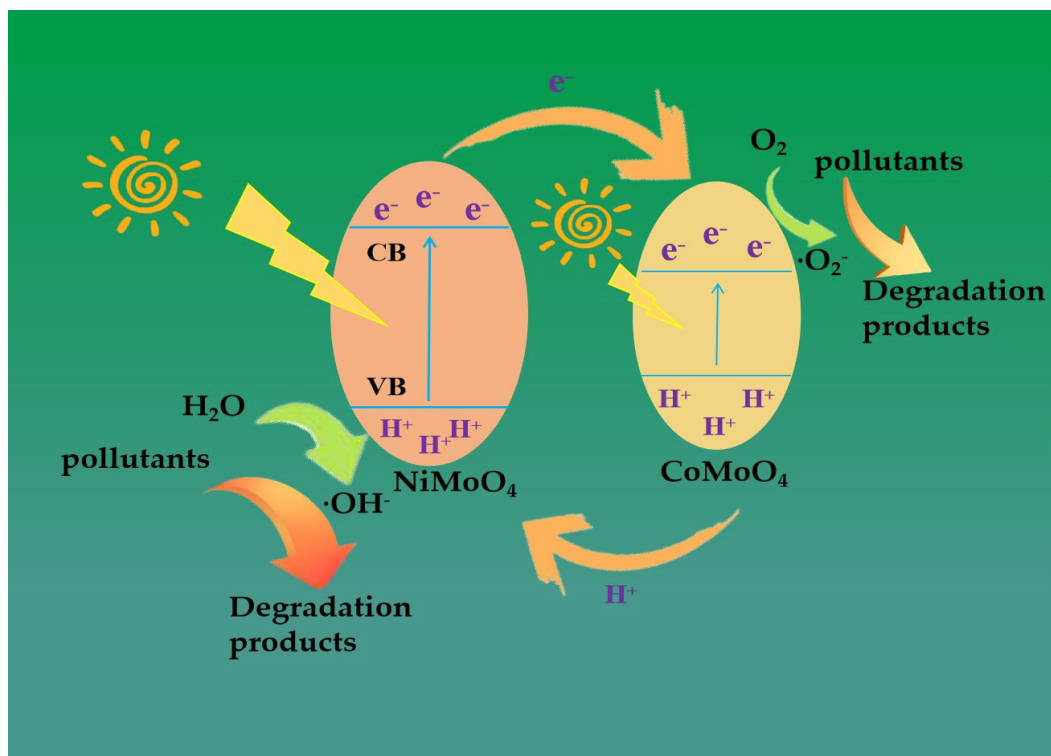

**Figure S9.** Photocatalytic mechanism diagram.

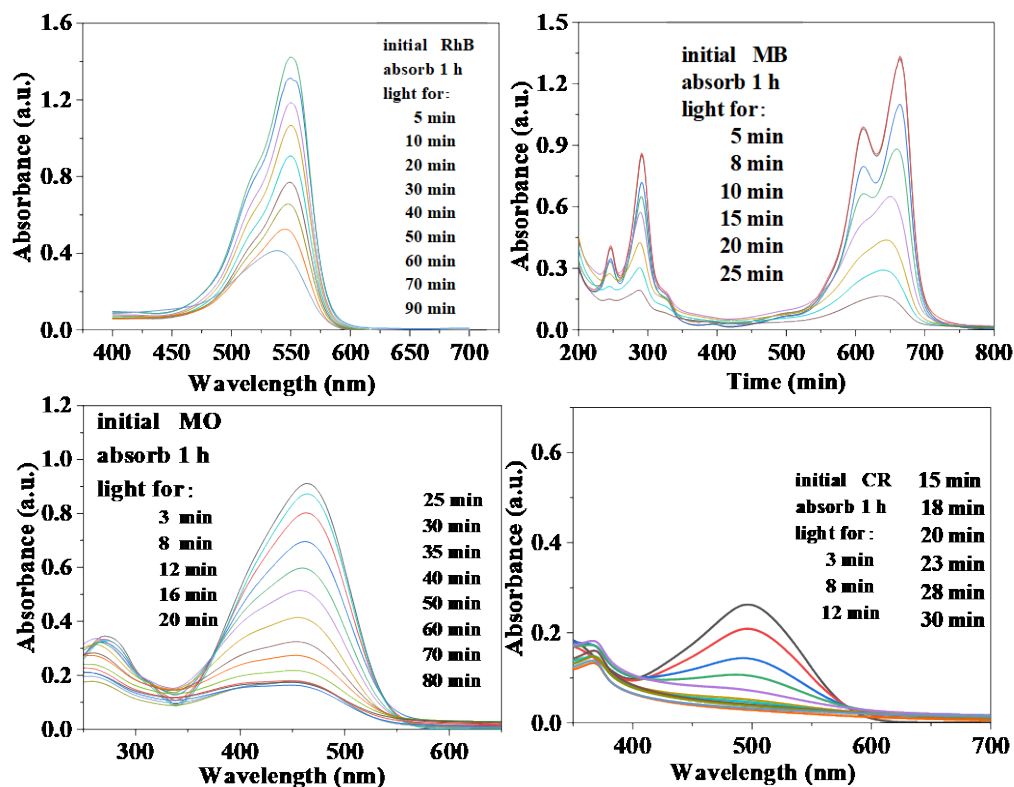

Figure S10. UV absorption spectra for (a) RhB; (b) MB; (c) MO and (d) CR aqueous solution during photodegradation with CoMoO<sub>4</sub>@NiMoO<sub>4</sub>.

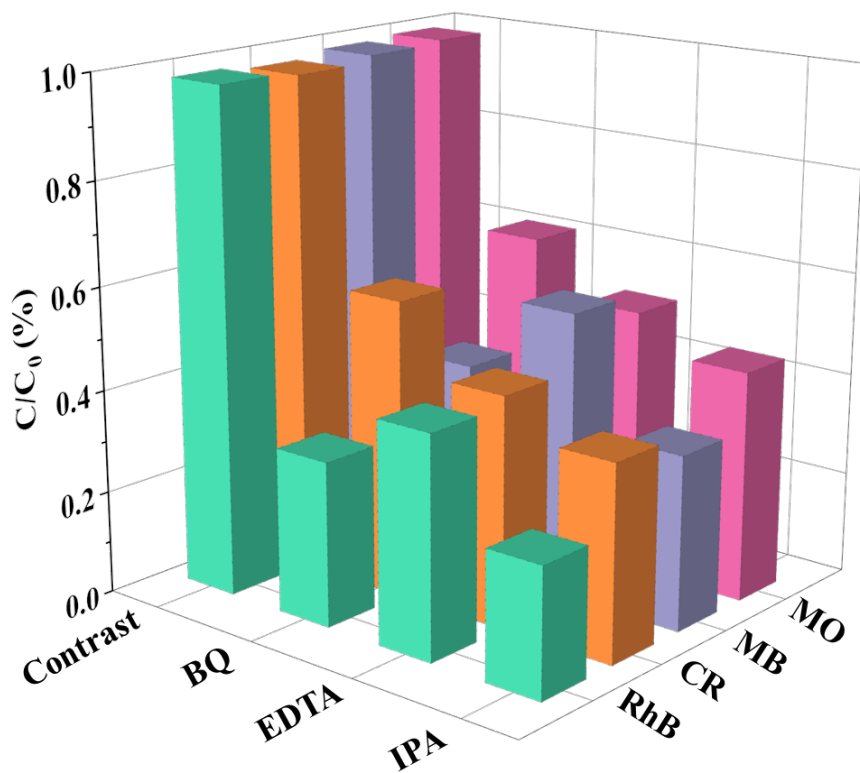

Figure S11. Degradation rate of RhB, CR, MB and MO to different masking agents.



**Table S1** Electrochemical performance comparison of the Devices

| The device name                                           | Current density       | specific capacitance | Cycle stability | Ref        |
|-----------------------------------------------------------|-----------------------|----------------------|-----------------|------------|
| $\beta$ -CoMoO <sub>4</sub> //AC                          | 1 A/g                 | 27.7 F/g             | 92%(8000)       | [68]       |
| NiMoO <sub>4</sub> //AC                                   | 1 A/g                 | 151.7 F/g            | 97.7%(2000)     | [69]       |
| NiMoO <sub>4</sub> //AC                                   | 1 mA cm <sup>-2</sup> | 156.25 F/g           | 83.6%(6000)     | [70]       |
| MnCo <sub>2</sub> O <sub>4</sub> @NiMoO <sub>4</sub> //AC | 1 A/g                 | 118.27 F/g           | 93%(8000)       | [71]       |
| NiMoO <sub>4</sub> -CoMoO <sub>4</sub> //G-ink            | 1 A/g                 | 104.1 F/g            | 95.88%(5000)    | [72]       |
| CoMoO <sub>4</sub> +NiMoO <sub>4</sub> //CNTs)            | 1 A/g                 | 142 F/g              | 97.7%(10 000)   | [73]       |
| MnMoO <sub>4</sub> @CNF//AC                               | 0.2                   | 102.56 F/g           | 92.1%(5000)     | [74]       |
| CoMoO <sub>4</sub> @NiCo <sub>2</sub> S <sub>4</sub> //AC | 5 mA cm <sup>-2</sup> | 182 F/g              | 84%(5000)       | [75]       |
| 0.8% Nd-CoMoO <sub>4</sub> @NiMoO <sub>4</sub> //CNTs     | 1 A/g                 | 262 F/g              | 99.2%(3000)     | This paper |

**Table S2** Degradation efficiency of dyes by materials

| Materials                                                                                    | dye | degradation time | degradation rate | Catalyst dose | Dye conc. vol. (mL) | Cyclic stability | Ref        |
|----------------------------------------------------------------------------------------------|-----|------------------|------------------|---------------|---------------------|------------------|------------|
| g-C <sub>3</sub> N <sub>4</sub> /TiO <sub>2</sub> / $\alpha$ -Fe <sub>2</sub> O <sub>3</sub> | RhB | 50 min           | 95.7%            | 50 mg         | 50 mg/L (100 mL)    | >92% (5)         | [83]       |
| Ag <sub>2</sub> O/g-C <sub>3</sub> N <sub>4</sub> /TiO <sub>2</sub>                          | RhB | 60 min           | 94.5%            | 50 mg         | 50 mg/L (100 mL)    | Nearly 93% (5)   | [84]       |
| 0.8% Nd-CoMoO <sub>4</sub> @NiMoO <sub>4</sub>                                               | RhB | 90 min           | 97.2%            | 40 mg         | 50 mg/L (100 mL)    | 96% (50)         | This paper |
| ZnO                                                                                          | CR  | 5 h              | > 95%            | 30 mg         | 20 mg/L (10 mL)     | Nearly 84% (3)   | [85]       |
| Ag-MgO                                                                                       | CR  | 120 min          | 80%              | 10 mg         | 10 mg/L (100 mL)    |                  | [86]       |
| 0.8% Nd-CoMoO <sub>4</sub> @NiMoO <sub>4</sub>                                               | CR  | 30 min           | 96.4%            | 40 mg         | 50 mg/L (100 mL)    | 98.5% (50)       | This paper |



|                                                |    |        |        |       |                  |            |            |
|------------------------------------------------|----|--------|--------|-------|------------------|------------|------------|
| ZnCo <sub>2</sub> O <sub>4</sub>               | MB | 40 min | 98.8%  |       | 40 mg/L (200 mL) | 98.5% (15) | [87]       |
| ZnO–SnO <sub>2</sub>                           | MB | 60 min | 96.53% | 0.2 g | 20 mg/L (10 mL)  | over 85%   | [88]       |
| 0.8% Nd-CoMoO <sub>4</sub> @NiMoO <sub>4</sub> | MB | 25 min | 98.6%  | 40 mg | 50 mg/L (100 mL) | 98% (50)   | This paper |
| TiO <sub>2</sub> @Cd-MOF                       | MO | 90 min | 97.1%  | 10 mg | 10 mg/L (10 mL)  | 85.1% (3)  | [89]       |
| Au-TiO <sub>2</sub>                            | MO | 20 min | 94%    | 5 mg  | 250 mg/L (10 mL) |            | [90]       |
| 0.8% Nd-CoMoO <sub>4</sub> @NiMoO <sub>4</sub> | MO | 80 min | 99.3%  | 40 mg | 50 mg/L (100 mL) | 96.2% (50) | This paper |

**Table S3** Kinetic parameters of photocatalytic degradation of 0.8% Nd-CoMoO<sub>4</sub>@NiMoO<sub>4</sub>

| dyes | <i>k</i> (min)          | <i>r</i> <sup>2</sup> |
|------|-------------------------|-----------------------|
| MO   | 3.98 x 10 <sup>-3</sup> | 0.9986                |
| RhB  | 3.14 x 10 <sup>-3</sup> | 0.9958                |
| CR   | 3.59 x 10 <sup>-3</sup> | 0.9976                |
| MB   | 3.79 x 10 <sup>-3</sup> | 0.9982                |
